# Supplementary material
Source: Springer Nature journal article supplement (https://www.springermedizin.de/resource/supplementary/12872_2009_244_MOESM6_ESM.pdf/9431324)

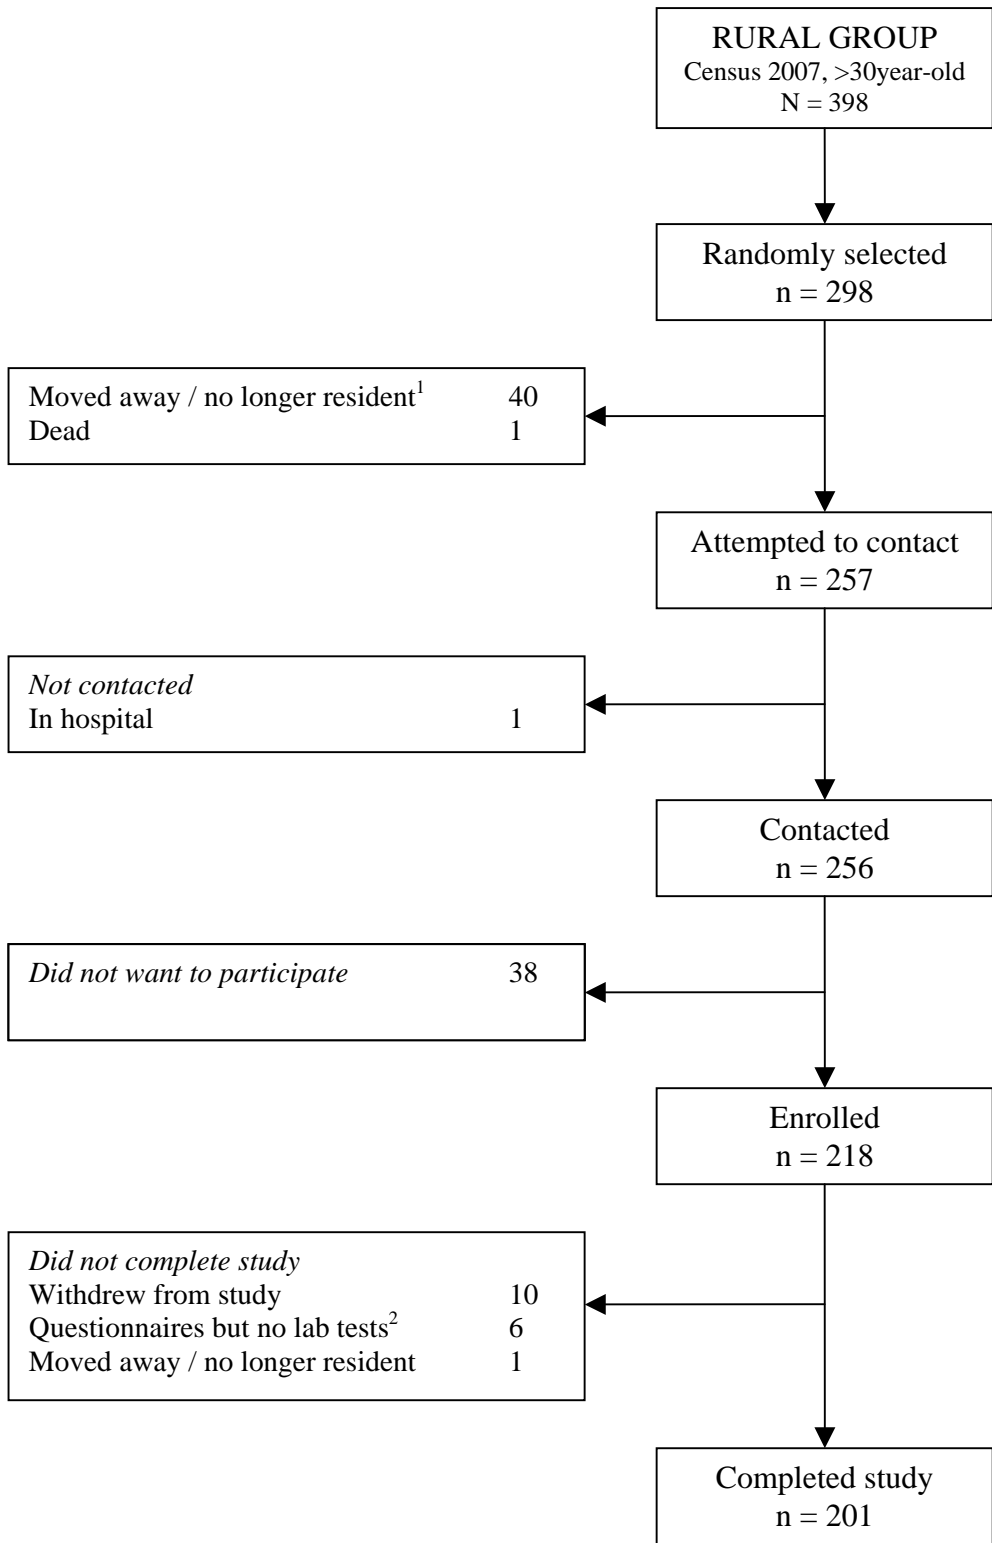

Supplement: MOESM6 [file 9431324]
